# Supplementary material for: Improvement of direct methanol fuel cell performance using a novel mordenite barrier layer
Source: Royal Society of Chemistry journal article supplement (doi:10.1039/c6ta03485c), 2016-01-01
Supplement: c6ta03485c1.pdf [file c6ta03485c1.pdf]

### Supplementary Data

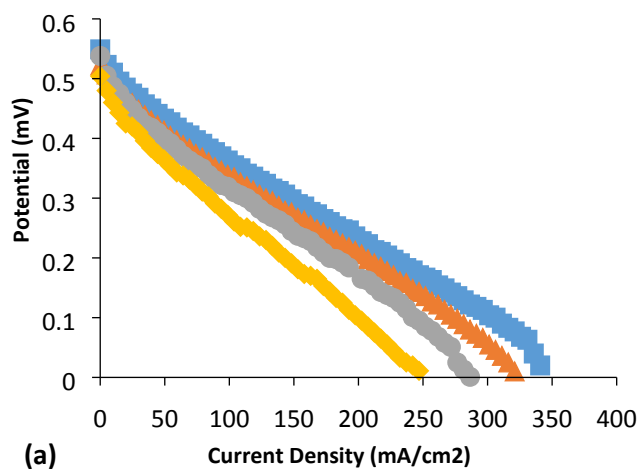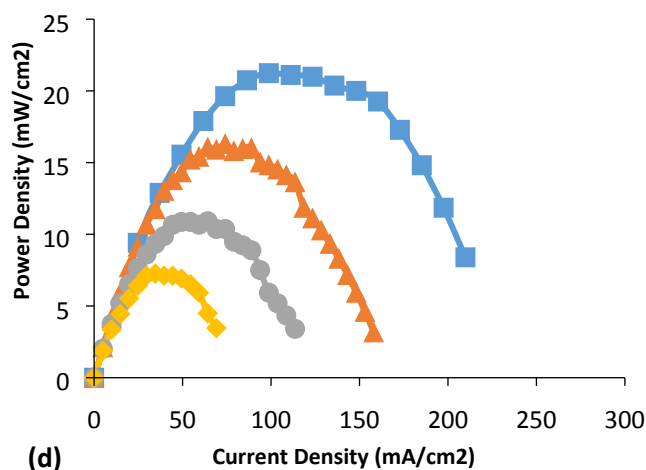

**Figure S1** ■ 70°C, ▲ 60°C, ● 50°C, ◆ 40°C a. Experimental results showing DMFC performance for Nafion 117 MEA (a,b) a 2M methanol feed and (c,d) a 4M methanol feed, operating temperatures between 40°C and 70°C were used. (a and c) Polarization curves (b and d) Power Density curves.

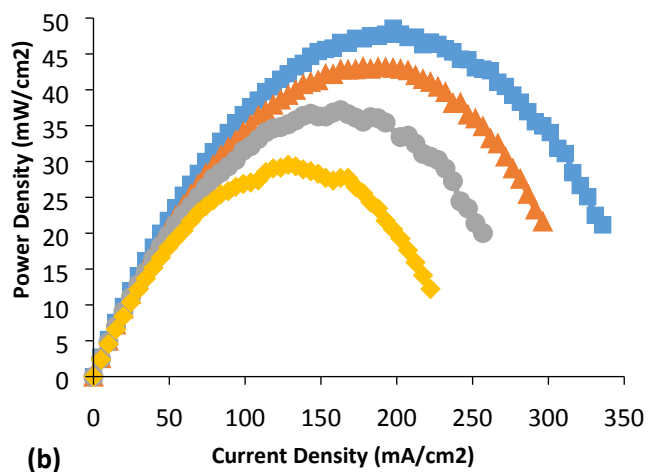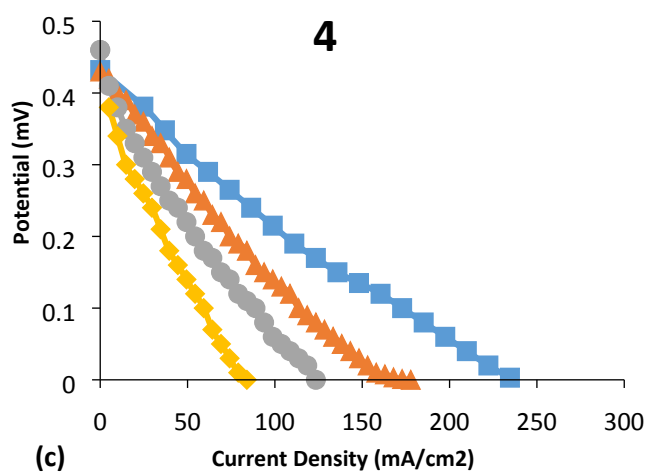

4

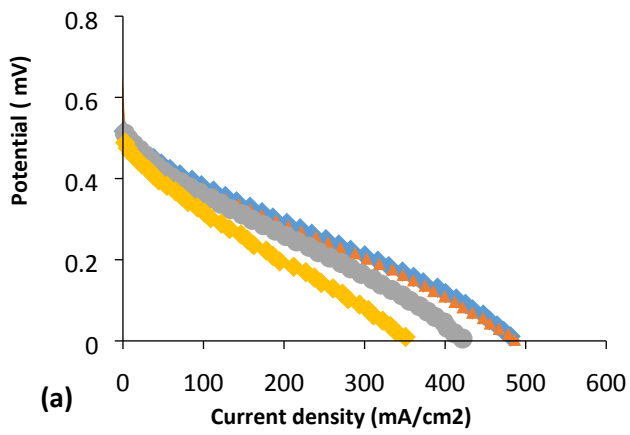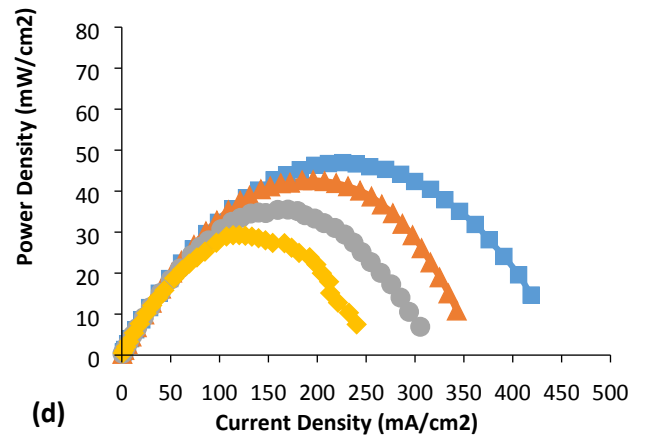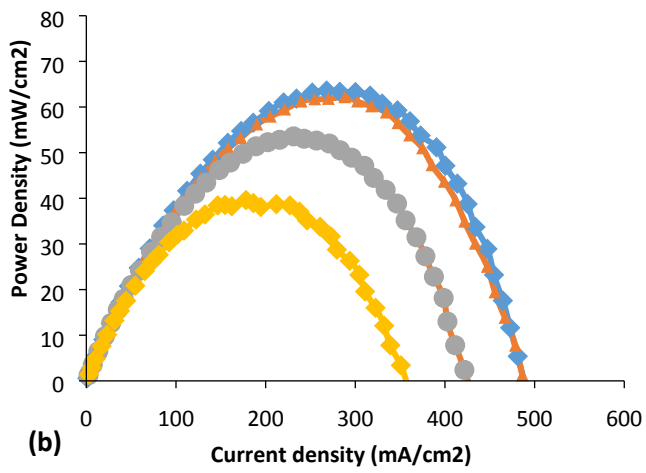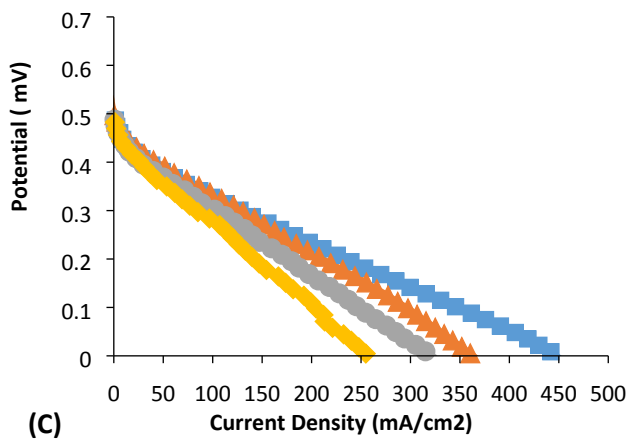

**Figure S2** ■ 70°C, ▲ 60°C, ● 50°C, ◆ 40°C a. Experimental results showing DMFC performance for 0.5% loading (a,b) a 2M methanol feed and (c,d) a 4M methanol feed, operating temperatures between 40°C and 70°C were used. (a and c) Polarization curves (b and d) Power Density curves.
